# Supplementary material for: Root-Specific Expression of a Jacalin Lectin Family Protein Gene Requires a Transposable Element Sequence in the Promoter
Source: MDPI journal article supplement (doi:10.3390/genes9110550), 2018-11-13
Supplement: s1 [file s1]

Supplementary figures

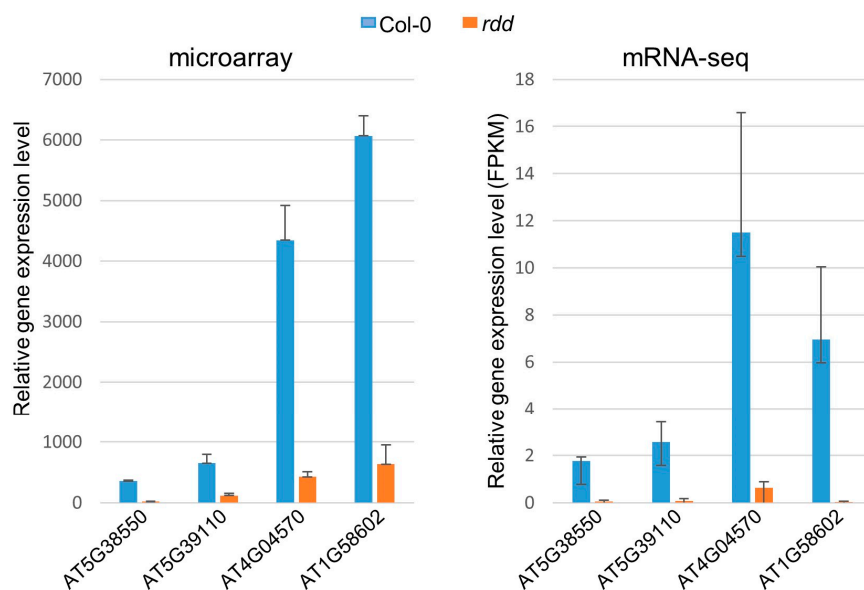

**Figure S1.** The four genes selected for promoter study in this paper show strong down regulation in *rdd* based on both microarray (left; [1]) and mRNA deep sequencing (right; three biological replicates for each genotype) analyses of three-week old plants.

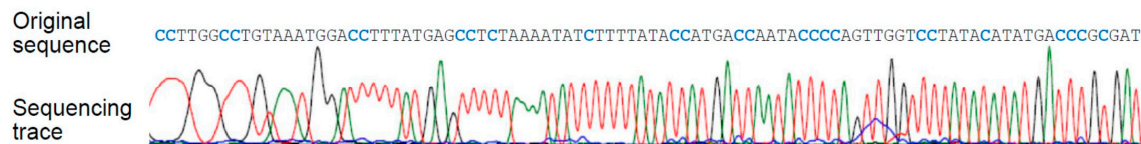

**Figure S2.** A typical trace file of bisulfite sequencing analysis of the chloroplast genome-encoded *psaA* gene, showing efficient bisulfite conversion. The original nucleotide sequence is shown above, with cytosines highlighted in blue. Note that all cytosines appear as thymines (red peak) in the sequencing trace of the PCR product. All bisulfite-treated samples used in this study showed a similar trace file, indicating efficient bisulfite conversion

## T2 plants, Col-0 background

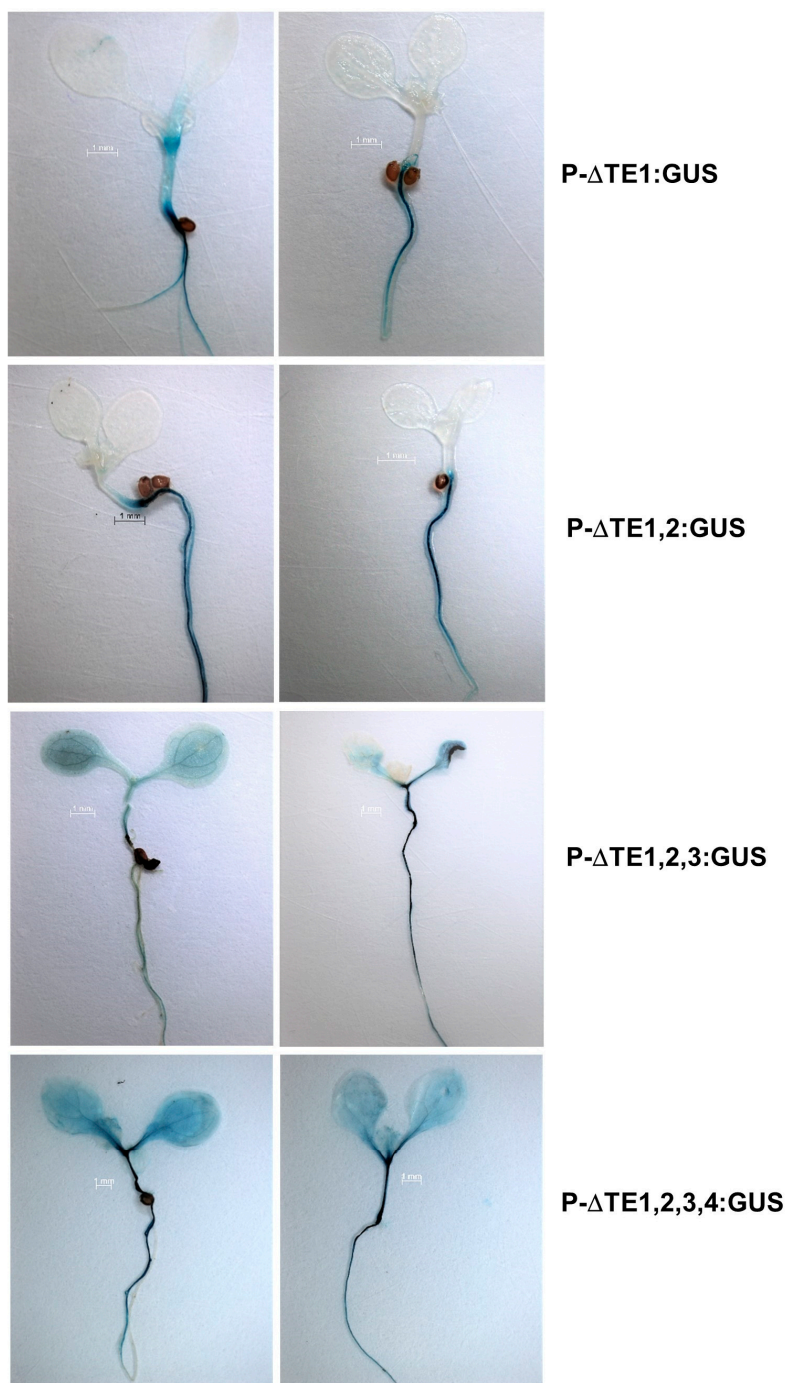

**Figure S3.** Histochemical analysis of GUS expression in the T2 plants of the truncated At5G38550 promoter:GUS lines. Note that the root specificity of GUS expression is retained when the first two TEs were deleted, but lost after the deletion of the third TE sequence in the promoter fragment.

**Sequence of *AT5G38550* promoter :**

ATCAGAGAGTTTTCCCTATCGTTTTCCCTCGTTTATAATTGCATTTTTTCATCGTTACTATT  
 CGTTAAATATTTTAAATTTTTTAAATTTAAATATCTTTGCAGTTATGTCTTCTTACAAAGT  
 GTCTTTTCTCCATATTTATTTGTATTTTCTTATCACAATTATTTCTTTCTAAAAATTA  
 ATATTTTACAAATATTTGTGTCAATTTAATTGTTTATATCTTCTGAACTCTATATACTTTT **At5TE55860**  
 GTTTACCAATATTCAATCTTCTGACAATTGTTTTTTTAAAGATGATTGATGGTCCAAGA  
 TTAAACCCGACCCGGACAGTGAACCCGACTACCTTCTCGATTATTGGGTCATCGGGTTAA  
 CCAGGTTGGACCATAAGTCAATTAATTTAAATTTTATTTAATAAAATTTAATATTAATAAGA  
 TTTTAGAGTTCTTTATAAATTTAAAAATAAAAATAATCATGTTTATAAAATATAAAATCAG  
 ATTTATGTTTAAATAAAATATAAAATCATTATACCAAAAAATAATAAAAAAAATAAAT  
 AATATATATATATATAATCAACAATAATAATAAAGTGATTAAATTTTTTAAATCCAAC  
 AAACGTCTAATACCATAACAAATATAGTAGTAGATCACCAATGACGGAATAAACTAGTA  
 AAACATCGTGAATTTACACAATAATATCGGGTGTCTCACTCACCATTTCGTTTCATTTTT  
 AAGGCGGCATTGTAAAGTCTTCGTCAAATGTAAACCATAAAATGAGTTTACGAACGTAA  
 AAGATTTCTAAAAATGATTGAATAAAGTCTAAAATCTCATATTATATTTCCAAAAATAAGA  
 GAATATTTTAAACCCACACCCGACCGGTTCCACGGATCATAGGTTAATAGTGAGTTTTT  
 GTGGGTTTTTTTGAATTTGAACTTGTCTGGGTTTTAGCACTAAACCTAAATCAGAAAAATG  
 TTTGGGTCACGGTTCAACCGGTCGGACCGAGTGTGAAAACTGACCAC TGGGTTTTTCT **At5TE55855**  
 ATTTAAAAATAAGTTGAGAGTTTTTAAATGGATAAGTCTAAACTTGAGGGTTTTTTCATT  
 AAAATTTATTTTCTAAAAATAACAACAACAATTTATAATATTCATCATTTTGAGTTTGAT  
 TTATTTGTTGAGAAATATTGTATAAACAATTTTAAATATTTTCTTCATGAAATCGCGA  
 GAAAAGATATGTTTGAGTTTATTAATAATAAAAAATAATCAGATCATGTTTAAACAAAATA  
 TAAAGTCTAACAATAATAAGAAAGTGATTAAAAATTTATAAATCTAACTAAAAACACGGTAA  
 AAAATACTAAGATAGTAGGATAGTGAATACGAAGAATTTAAAAAGTTTTGAAATAATT  
 CAATAATGAACAGTGAATACACTAAAACTCTATCTTTTTTGTCCAAAATCAAATATATATA **At5TE55850**  
 TTTTAAACGAATACCCGACAGTTTACCAGATCACAAGTTAGTGCCAAATTTTTGTGGA  
 TTTTGTGCGCTTTTTAAATTTGTCTGGATATTAACAGTAACTCAAACCCGATAAATATCTGT  
 AACACTGGTTAACCAGTAAGGATTGGACGTGCAGATTTTTTTTTTCTTTTTTGAATGAAT  
 GACCAATGTCTGAAGCTTTACGGTTTGGTTGCAAACAGAGTTGCAGTCCATCTCTCATGG  
 AGGTTGAACCCATTGAGATATATATAGAAGCGATTCCGAAGTGTCCGGTCAATCACT **At5TE55845**  
 TGAATTATTACCGATGCAGAGATGGGAAGCTCACCATTGTCTTCTCGATTCTTTCCGTC  
 CAAATTGAATGGACTGTCTGCTTTAAATATACGTAGCGTAAAAATGAATTGATGCGTCTTCG  
 AGAACTGAGAAGTGGAGACAATACTTAGCAAAGCAGAGTAATCCAAAGTAAAAATCTTGCA  
 TGAGAATTGCGCTTGGCAAGATGTTCCAGATTTGAGCCGAGAATGTGCAGCTGAAAAACA  
 AATGATCCCTTGTCTCAAAATGGAACCTGACAAAACACACATGTTGGATTGAGATTTCGATG  
 ACCAAGAGCACATTTGATCACATGTACGTTGAAGTTGGTTTTATGTTTCTAAAAATAAT  
 GCCAAACAATAAATGCTCGAACTGAAGTCCACCTACAAGTTTACGAGTAGGTTTGTCA  
 TATCATAAAAAACAAAATCTACGCTGTGATGAGATGCAATCATGCAAGGTCGTTTTAAA  
 ATAATCGTTTTGTTTGTGAAGACGTACTTTAGGTAGTCTTTGAATAATTATTTTCACAACT  
 AGTTTATATTTTACAAAATTTAATATTTAATCTTGCAACCAGCAGCCTCATATATAACAA  
 TATAAATATACATTTTAGAAAAATGGCCAAAACCTGTATATATGAAAAAGCCAAAGTCCA  
 TCGCTAAACTTACTGATCAGCATAGCAGTCTGTTCACTTCAGAGGTCAGCTCTTTTCTC **At5G38550 gene**  
 TTTCCCTCATAAGCATGCTTACTTCTTATTTCGCACCAATGTTTTAACCTTAAATAAGATC  
 TTATCGAAATCTATTATTTATGTGAACGTAATGAGCATAGTTTTAGATATCCTCTTACAG  
 TAGTTCCGTT

**Figure S4.** The hAT TE sequence (At5TE55850) contains potential binding sites for AHL20 (AAAT) and ARR11 (GGATT)-binding motifs.

**Reference**

1. Le, T.N.; Schumann, U.; Smith, N.A.; Tiwari, S.; Au, P.C.; Zhu, Q.H.; Taylor, J.M.; Kazan, K.; Llewellyn, D.J.; Zhang, R.; et al. DNA demethylases target promoter transposable elements to positively regulate stress responsive genes in Arabidopsis. *Genome Biol.* **2014**, *15*, 458.
