# Supplementary material for: Root-Specific Expression of a Jacalin Lectin Family Protein Gene Requires a Transposable Element Sequence in the Promoter
Source: MDPI journal article supplement (doi:10.3390/genes9110550), 2018-11-13
Supplement: s1 [file s1]

Supplementary Table 1. Oligonucleotide primers used in this study

|                                        |                                                                                                                                                                                                                                                                                                                                                              |
|----------------------------------------|--------------------------------------------------------------------------------------------------------------------------------------------------------------------------------------------------------------------------------------------------------------------------------------------------------------------------------------------------------------|
| At5G38550 promoter fragment            | Forward primer: CCTGCAGCTGGAAAGAATCTAAGTGCCTAG<br>Reverse primer: CGAGCTCCCTTGAACCTGATGTTATCAATATTC                                                                                                                                                                                                                                                          |
| At5G39110 promoter fragment            | Forward primer: CCTGCAGCCATAAGCTATGGCTGTGGTTTTG<br>Reverse primer: CGAGCTCCCTTTTCAAACAAAAGGTTATGCTAATCC                                                                                                                                                                                                                                                      |
| At4G04570 promoter fragment            | Forward primer: CCTGCAGCCCATCTCCATAACTCTCTCG<br>Reverse primer: CGAGCTCCCGTTTGTGTTTAAAGATAACAACCTC                                                                                                                                                                                                                                                           |
| At1G58602 promoter fragment            | Forward primer: CCTGCAGCCTCACCACACAACTCTATATCAC<br>Reverse primer: CGAGCTCCCTTTTGAATCTTGATCGCGCC<br>Reverse primer for all (same as above for full-length promoter):<br>CGAGCTCCCTTGAACCTGATGTTATCAATATTC                                                                                                                                                    |
| At5G38550 truncated promoter fragments | Forward primer for P- $\Delta$ TE1,2,3,4: CTGCAGATGTCACGTTGAAGTTGGTTTTATG<br>Forward primer for P- $\Delta$ TE1,2,3: CTGCAGGAATGAATGACCAATGCTGAAGC<br>Forward primer for P- $\Delta$ TE1,2: CTGCAGGAACAGTGAATACACTAAAACCTC<br>Forward primer for P- $\Delta$ TE1,2: CTGCAGACCACTGGGTTTTCTATTTAAAAATAAG                                                       |
| Bisulfite primers for AT5G38550p:GUS   | <b>Bisulfite region 1:</b><br><u>Primary PCR</u><br>AT5G38550-Bi-F1 (GBis-F1): TTTTAAAGGYGGYATTGTAAAG<br>AT5G38550-Bi-R1 (GBis-R1): TAAATTTTATACAATATTTCTC<br><u>Nested PCR</u><br>AT5G38550-Bi-F1 (GBis-F1): TTTTAAAGGYGGYATTGTAAAG<br>AT5G38550-Bi-R2 (GBis-R2): TCTCAAACAATAAATCAAACCTC                                                                   |
|                                        | <b>Bisulfite region 2:</b><br><u>Primary PCR</u><br>AT5G38550-Bi-F2 (GBis-F2): TTAYYGATGYAGAGATGGGAAG<br>AT5G38550-Bi-R3 (GBis-R3): TRTRAAATAATTATTCAAARACTACC<br><u>Nested PCR</u><br>AT5G38550-Bi-F2 (GBis-F2): TTAYYGATGYAGAGATGGGAAG<br>AT5G38550-Bi-R4 (GBis-R4): AARTACRTCTCCACAAACAAAC                                                                |
|                                        | <b>Bisulfite region 3:</b><br><u>Primary PCR</u><br>AT5G38550-Bi-F3 (023-Bi-F2): GYAGTYGTTYATYTTYAGAGG<br>GUS-Bi-R1 (018-Bi-R1): CACCAACRCRATCAATTCCAC<br><u>Nested PCR</u><br>AT5G38550-Bi-F3 (023-Bi-F2): GYAGTYGTTYATYTTYAGAGG<br>GUS-Bi-R2 (018-Bi-R2; Pro:GUS junction): CRATRAATTCRARTCRRTACCC                                                         |
|                                        | <b>Bisulfite region 1:</b><br><u>Primary PCR</u><br>LB-Bis-F1 (018-Bi-F1): GTGGYAGGATATATTGTGGTG<br>AT4G04570p-Bi-R1 (025-Bi-R1): CRCRTCTTTRTTAACTTCCAAAC<br><u>Nested PCR</u><br>LB-Bis-F1 (018-Bi-F2): TGTAYTGAATTYTYATGTTTG<br>AT4G04570p-Bi-R2 (025-Bi-R2): CAACAACRARTRATAAACATC<br>AT4G04570p-Bi-R3 (025-Bi-R3): ARAAARARACACAACCTCTTTAC               |
|                                        | <b>Bisulfite region 2:</b><br><u>Primary PCR</u><br>AT4G04570p-Bi-F1 (025-Bi-F1): AGAGGAAYYATTGTAAAATAG<br>GUS-Bi-R1 (018-Bi-R1): CACCAACRCRATCAATTCCAC<br><u>Nested PCR</u><br>AT4G04570p-Bi-F2 (025-Bi-F2): GTYAATGGTYGTATGTGAATGG<br>AT4G04570p-Bi-F3 (025-Bi-F3): YATTGAAAGATAAYTTGTG<br>GUS-Bi-R2 (018-Bi-R2; Pro:GUS junction): CRATRAATTCRARTCRRTACCC |
|                                        |                                                                                                                                                                                                                                                                                                                                                              |
|                                        |                                                                                                                                                                                                                                                                                                                                                              |
|                                        |                                                                                                                                                                                                                                                                                                                                                              |
|                                        |                                                                                                                                                                                                                                                                                                                                                              |
|                                        |                                                                                                                                                                                                                                                                                                                                                              |
|                                        |                                                                                                                                                                                                                                                                                                                                                              |
| Bisulfite primers for AT4G04570p:GUS   |                                                                                                                                                                                                                                                                                                                                                              |

**Supplementary Table 2.** Number of primary transgenic lines obtained

| Constructs       | No lines in Col-0 | No. lines in <i>rdd</i> |
|------------------|-------------------|-------------------------|
| AT5G38550p:GUS   | 23                | 24                      |
| AT5G39110p:GUS   | 15                | 12                      |
| AT4G04570p:GUS   | 25                | 28                      |
| AT1G58602:GUS    | 16                | 14                      |
| P-ΔTE1:GUS       | 19                | 10                      |
| P-ΔTE1,2:GUS     | 16                | 14                      |
| P-ΔTE1,2,3:GUS   | 14                | 11                      |
| P-ΔTE1,2,3,4:GUS | 18                | 22                      |

**Supplementary Table 3.** Transcription factor-binding motifs identified in At5GTE55850

| Cis-element | Family     | Time of occurrence | Expression pattern of TF in AtGenExpress database |
|-------------|------------|--------------------|---------------------------------------------------|
| AHL12       | AT-hook    | 9                  | Shoot apex and flowers                            |
| AHL20       | AT-hook    | 12                 | <b>Root-specific</b>                              |
| AHL25       | AT-hook    | 5                  | unrecorded                                        |
| ARR11       | GARP/ARR-B | 5                  | <b>Root-preferential</b>                          |
| DOF2        | C2C2 (Zn)  | 2                  | Constitutive                                      |
| DOF5.7      | C2C2 (Zn)  | 3                  | unrecorded                                        |
| GT1         | Trihelix   | 4                  | Constitutive                                      |
| KAN1        | GARP       | 2                  | Constitutive                                      |
| RVE1        | MYB        | 5                  | Constitutive                                      |
| ZmHOX2a     | HD-HOX     | 2                  | unrecorded                                        |
